# Supplementary material
Source: publisher figshare collection journal article supplement (https://tandf.figshare.com/ndownloader/files/20186205)
Supplement: Supplementary file 1 [file 20186205]

Changes made in biological therapy during follow-up time.

| **Patients in deep remission (*n*=11)** | **Patients not achieving deep remission (*n*=15)** | |
| --- | --- | --- |
| Infliximab -> adalimumab; *n*=3 | Infliximab -> adalimumab; *n*=1 |  |
| Infliximab -> golimumab; *n*=3 | Infliximab -> vedolizumab; *n*=1 | |
| Infliximab -> vedolizumab; *n*=1 | Infliximab -> ustekinumab; *n*=1 | |
| Infliximab -> vedolizumab -> infliximab; *n*=2 | Infliximab -> ustekinumab -> infliximab; *n*=1 | |
| Infliximab -> golimumab -> ustekinumab; *n*=1 | Infliximab -> ustekinumab -> vedolizumab; *n*=1 | |
| Adalimumab -> vedolizumab; *n*=1 | Adalimumab -> infliximabi; *n*=4 | |
|  | Adalimumab -> vedolizumab; *n*=3 | |
|  | Adalimumab -> infliximab -> vedolizumab; *n*=1 | |
|  | Adalimumab -> vedolizumab -> infliximab; *n*=1 | |
|  | Adalimumab -> infliximab -> ustekinumab -> vedolizumab; *n*=1 | |
